# Supplementary material
Source: Oxford University Press journal article supplement (https://aap2.silverchair-cdn.com/aap2/content_public/journal/pediatrics/issue/149/supplement+4/1/toc.pdf)

## CONTENTS

## ARTICLES

- S256 **Promoting Lifespan Health and Well-Being Through the Autism Intervention Research Network** Alice A. Kuo
- S259 **The Autism Intervention Research Network on Physical Health (AIR-P) Charter** Alice A. Kuo et al
- S262 **The Autism Intervention Research Network on Physical Health (AIR-P) Research Agenda** Alice A. Kuo et al
- S270 **The Autism Intervention Research Network on Physical Health Autistic Researcher Review Board** Heather M. Brown et al
- S274 **Meeting the Primary Care Needs of Autistic Individuals**  
Alice A. Kuo et al
- S276 **Promoting Healthy Lifestyles and Well-Being in Autistic Youth**  
Candace M. Gragnani et al
- S278 **Improving Care and Service Delivery for Autistic Youths Transitioning to Adulthood** Paul Shattuck et al
- S280 **Improving the Sexual and Reproductive Health and Health Care of Autistic People** Laura Graham Holmes et al
- S282 **Improving Awareness, Identification, and Treatment of Motor Impairments in Autism** Rujuta B. Wilson
- S284 **The Role of Genetic Testing Among Autistic Individuals** Iram Shafqat et al
- S286 **Addressing the Intersectionality of Race and Disability to Improve Autism Care** Elizabeth H. Morgan et al
- S288 **First Do No Harm: Suggestions Regarding Respectful Autism Language**  
Patrick Dwyer et al
- S290 **Autism and COVID-19** Priyanka Fernandes et al
- S292 **Promoting Interdisciplinary and Participatory Autism Research**  
Kashia A. Rosenau et al
- S294 **Barriers to Inclusive Learning for Autistic Individuals** TC Waisman et al
- S296 **Hospital Inpatient Stays for Autistic Youth and Youth With Other Disabilities** Jessica E. Rast et al
- S302 **Family Perceptions of Health Care Access for Autistic Young Adults Receiving Disability Services** Anne M. Roux et al
- S308 **Reproductive Health and Substance Use Education for Autistic Youth**  
Laura Graham Holmes et al
- S316 **A Residency Program Curriculum to Improve Health Care Transitions for Autistic Individuals** Priyanka Fernandes et al
- S323 **Emergency Visits for Autistic Children and Children With ADHD**  
Whitney Schott et al

doi: 10.1542/peds.2020-049437

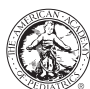

Supplement: Supplementary file 1 [file toc.pdf]
